# Supplementary material for: Yeast Chaperone Hsp70-Ssb Modulates a Variety of Protein-Based Heritable Elements
Source: MDPI journal article supplement (doi:10.3390/ijms24108660), 2023-05-12
Supplement: s1 [file s1]

# **Yeast chaperone Hsp70-Ssb modulates a variety of protein-based heritable elements**

Lina M. Jay-Garcia, Joseph L. Cornell, Rebecca L. Howie, Quincy L. Faber,  
Abigail Salas, Tatiana A. Chernova, and Yury O. Chernoff\*

## **SUPPLEMENTAL MATERIALS**

### **List of materials**

Supplemental Figures, S1 through S3

Supplemental Tables, S1 through S15

## Supplemental Figures

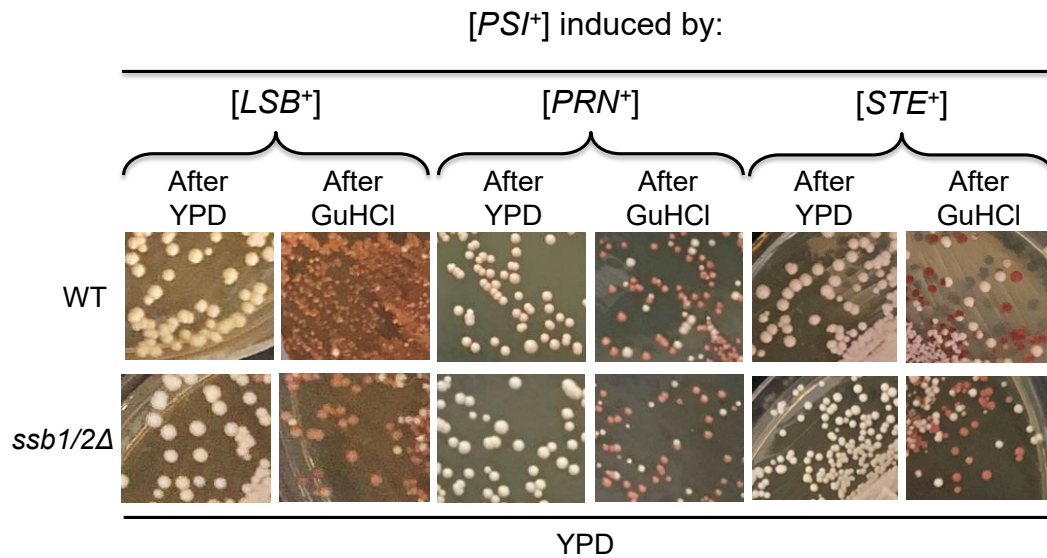

**Figure S1. Curing of [PSI<sup>+</sup>] colonies induced in the presence of various prions by growth in the presence of GuHCl.** Colonies were passaged three times on either YPD medium or YPD medium with GuHCl (5 mM for WT and 2 mM for *ssb1/2Δ*), and then streaked out for single subcolonies on a fresh YPD plate. [PSI<sup>+</sup>] loss is seen by appearance of red and mosaic colonies. Typical examples are shown. See Table S5 for numbers.

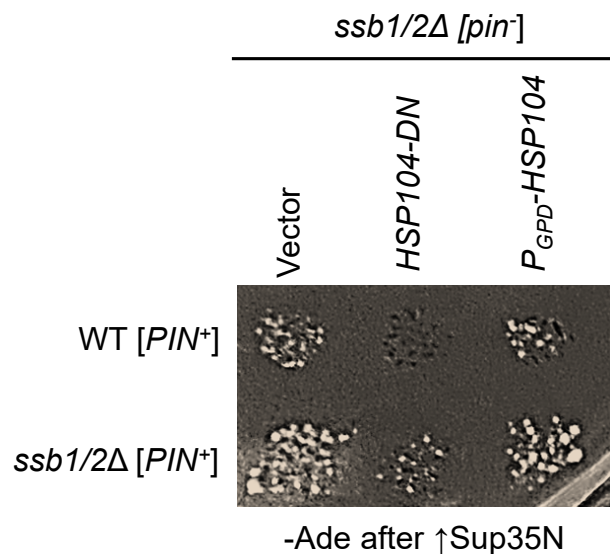

**Figure S2. Curing of [*PIN*<sup>+</sup>] prion by transient inactivation of Hsp104.** The experiment was performed by mating assay in the same as described in Materials and Methods and shown on Fig. 2E for [*LSB*<sup>+</sup>]. The wild-type (WT) and *ssb1/2Δ* [*PIN*<sup>+</sup>] isolates containing the *TRP1* *P<sub>GAL</sub>*-*SUP35N* construct were mated to the *ssb1/2Δ* [*pin*<sup>-</sup>] strain of opposite mating type, bearing the following *URA3* plasmids: empty vector (Vector), dominant negative allele of *HSP104* (*HSP104-DN*), or WT *HSP104* overexpressor cassette (*P<sub>GPD</sub>*-*HSP104*) under the *P<sub>GPD</sub>* promoter. After the selection of diploids on –Ura-Trp, the [*URA3*] plasmids were cured by counterselection on 5-FOA medium. Then, Sup35N was induced on galactose medium, followed by detection of [*PIN*<sup>+</sup>] prion via its ability to cross-seed the formation of [*PSI*<sup>+</sup>] prion, as seen on –Ade medium. Transient overproduction of Hsp104-DN (but not transient overproduction of wild-type Hsp104) cures most cells of [*PIN*<sup>+</sup>], resulting in a great decrease in [*PSI*<sup>+</sup>] formation.

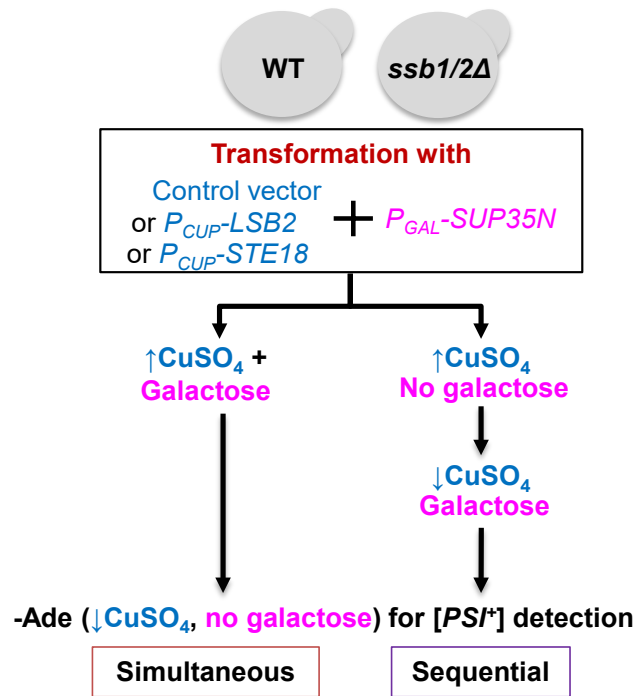

**Figure S3. Simultaneous and sequential overproduction protocols for  $[PSI^+]$  induction.** In the simultaneous overproduction protocol, both  $LSB2$  (wild-type or mutant) or  $STE18$  construct (under  $P_{CUP1}$  promoter) and  $SUP35N$  construct (under the  $P_{GAL}$  promoter) are overexpressed simultaneously on the medium containing both extra  $CuSO_4$  (the inducer of  $P_{CUP1}$ ) and galactose (the inducer of  $P_{GAL}$ ). In the sequential overproduction protocol, a construct under the  $P_{CUP1}$  promoter is overexpressed first in the conditions when a construct under the  $P_{GAL}$  promoter is silent. (The control plate without overexpression is run in parallel.) This is followed by overexpression of a  $P_{GAL}$  construct in the conditions when overexpression of a  $P_{CUP1}$  construct is turned off. Following overexpression, the plates are velveteen replica plated to  $-Ade$  medium (lacking both extra  $CuSO_4$  and galactose) for  $[PSI^+]$  detection. As experiments are performed with proliferating cultures, only heritable derivatives of  $[LSB^+]$  or  $[STE^+]$  should be capable of  $[PSI^+]$  induction in the sequential protocol.

## Supplemental Tables

**Table S1.** Aggregation of Lsb2 as detected by fluorescence microscopy.

| Strains        | Plasmid                          | Time (h) | No extra CuSO <sub>4</sub> |      |      |        | 100 $\mu$ M CuSO <sub>4</sub> |      |      |        |
|----------------|----------------------------------|----------|----------------------------|------|------|--------|-------------------------------|------|------|--------|
|                |                                  |          | Cells with aggregates      |      |      | Total* | Cells with aggregates         |      |      | Total* |
|                |                                  |          | Number                     | %    | SE** |        | Number                        | %    | SE** |        |
| WT             | <i>P<sub>CUP1</sub>-GFP</i>      | 0        | 0                          | 0.0  | 0.6  | 152    | 0                             | 0.0  | 0.6  | 152    |
|                |                                  | 6        | 0                          | 0.0  | 0.4  | 188    | 0                             | 0.0  | 0.2  | 255    |
|                |                                  | 12       | 0                          | 0.0  | 0.4  | 221    | 0                             | 0.0  | 0.4  | 207    |
|                |                                  | 24       | 0                          | 0.0  | 0.3  | 263    | 0                             | 0.0  | 0.5  | 197    |
|                |                                  | 48       | 0                          | 0.0  | 0.5  | 201    | 0                             | 0.0  | 0.3  | 183    |
| WT             | <i>P<sub>CUP1</sub>-LSB2-GFP</i> | 0        | 6                          | 1.7  | 1.7  | 260    | 6                             | 1.7  | 1.7  | 260    |
|                |                                  | 6        | 3                          | 2.5  | 1.3  | 166    | 53                            | 32.2 | 5.1  | 167    |
|                |                                  | 12       | 1                          | 1.8  | 1.8  | 60     | 17                            | 22.1 | 5.2  | 82     |
|                |                                  | 24       | 0                          | 0.0  | 0.3  | 308    | 27                            | 4.8  | 4.8  | 357    |
|                |                                  | 48       | 0                          | 0.0  | 0.5  | 208    | 0                             | 0.0  | 0.3  | 298    |
| <i>ssb1/2Δ</i> | <i>P<sub>CUP1</sub>-GFP</i>      | 0        | 0                          | 0.0  | 0.4  | 253    | 0                             | 0.0  | 0.4  | 253    |
|                |                                  | 6        | 0                          | 0.0  | 0.6  | 143    | 0                             | 0.0  | 0.4  | 191    |
|                |                                  | 12       | 0                          | 0.0  | 0.7  | 127    | 0                             | 0.0  | 0.4  | 214    |
|                |                                  | 24       | 0                          | 0.0  | 0.4  | 248    | 0                             | 0.0  | 0.4  | 205    |
|                |                                  | 48       | 0                          | 0.0  | 0.3  | 260    | 0                             | 0.0  | 0.4  | 216    |
| <i>ssb1/2Δ</i> | <i>P<sub>CUP1</sub>-LSB2-GFP</i> | 0        | 12                         | 8.8  | 4.1  | 160    | 12                            | 8.8  | 4.1  | 160    |
|                |                                  | 6        | 2                          | 13.3 | 3.3  | 16     | 34                            | 43.9 | 3.4  | 78     |
|                |                                  | 12       | 7                          | 5.4  | 1.9  | 126    | 10                            | 24.4 | 0.5  | 41     |
|                |                                  | 24       | 24                         | 7.8  | 5.7  | 434    | 55                            | 13.7 | 1.3  | 380    |
|                |                                  | 48       | 5                          | 1.9  | 0.6  | 255    | 15                            | 3.3  | 3.3  | 272    |

\* Cells with fluorescence.

\*\*SE refers to standard error.

Data for Fig. 1, C and D.

**Table S2.** Effect of *ssb1/2Δ* on [*LSB2*<sup>+</sup>] induction by Lsb2 overexpression.

| Strains        | Plasmid-based construct         | Number of cultures analyzed | [ <i>PSI</i> <sup>+</sup> ]-inducing colonies |      |     | Total colonies |
|----------------|---------------------------------|-----------------------------|-----------------------------------------------|------|-----|----------------|
|                |                                 |                             | Number                                        | %    | SD* |                |
| WT             | <i>P<sub>CUP1</sub></i>         | 4                           | 0                                             | 0.0  | 0.1 | 965            |
|                | <i>P<sub>CUP1</sub>-HA-LSB2</i> | 6                           | 16                                            | 0.8  | 1.0 | 2019           |
| <i>ssb1/2Δ</i> | <i>P<sub>CUP1</sub></i>         | 4                           | 23                                            | 4.3  | 1.9 | 538            |
|                | <i>P<sub>CUP1</sub>-HA-LSB2</i> | 6                           | 255                                           | 18.6 | 2.9 | 1372           |

Data for Fig. 1, E and F.

\*SD refers to standard deviation.

**Table S3.** Mitotic stability of the [*LSB*<sup>+</sup>] and [*PRN*<sup>+</sup>] prions in the WT and *ssb1/2Δ* backgrounds.

| Prion                       | Induced by                                              | Strain         | Mitotic stability* |               |             | Total tested |
|-----------------------------|---------------------------------------------------------|----------------|--------------------|---------------|-------------|--------------|
|                             |                                                         |                | High               | Intermediate  | Low         |              |
| [ <i>LSB</i> <sup>+</sup> ] | ↑Lsb2                                                   | WT             | 0                  | 1<br>(18%)    | 3<br>(0-9%) | 4            |
|                             |                                                         | <i>ssb1/2Δ</i> | 5<br>(40-72%)      | 0             | 0           | 5            |
|                             | ↑Lsb2<br>(tested after the loss of <i>LSB2</i> plasmid) | <i>ssb1/2Δ</i> | 4<br>(37.5-67%)    | 0             | 2<br>(0-8%) | 6            |
| [ <i>PRN</i> <sup>+</sup> ] | 39°C                                                    | WT             | 0                  | 0             | 2           | 2            |
|                             |                                                         | <i>ssb1/2Δ</i> | 0                  | 8<br>(12-28%) | 4<br>(0-6%) | 12           |

Examples are shown on Figs. 2A and 6C.

\*The observed ranges of prion retention for a given category are indicated in parenthesis.

**Table S4.** Curability of various prions by GuHCl in the *ssb1/2Δ* background.

| Prion               | Plasmid-based construct          | Curable | Incurable | Unstable undetermined | Total |
|---------------------|----------------------------------|---------|-----------|-----------------------|-------|
| [LSB <sup>+</sup> ] | <i>P<sub>CUP1</sub>-HA-LSB2</i>  | 0       | 5         | 0                     | 5     |
|                     | None                             | 0       | 3         | 2                     | 5     |
| [PRN <sup>+</sup> ] | None                             | 0       | 8         | 4                     | 12    |
| [STE <sup>+</sup> ] | <i>P<sub>CUP1</sub>-HA-STE18</i> | 0       | 7         | 2                     | 9     |
|                     | None                             | 0       | 2         | 2                     | 4     |

Examples are shown on Figs. 2C, 6D and 8E.

**Table S5.** Effect of GuHCl on the [PSI<sup>+</sup>] isolates induced in the presence of various prions.

| [PSI <sup>+</sup> ] isolates induced by | Strain         | Curable | Incurable | Total |
|-----------------------------------------|----------------|---------|-----------|-------|
| [LSB <sup>+</sup> ]                     | WT             | 6       | 0         | 6     |
|                                         | <i>ssb1/2Δ</i> | 12      | 0         | 12    |
| [PRN <sup>+</sup> ]                     | WT             | 3       | 0         | 3     |
|                                         | <i>ssb1/2Δ</i> | 12      | 0         | 12    |
| [STE <sup>+</sup> ]                     | <i>ssb1/2Δ</i> | 6       | 0         | 6     |

Examples are shown on Fig. S1.

**Table S6.** Formation of [*PRN*<sup>+</sup>] prions during heat stress.

| Strains              | Number of cultures analyzed | [ <i>PSI</i> <sup>+</sup> ]-inducing colonies before heat shock |           |                       | [ <i>PSI</i> <sup>+</sup> ]-inducing colonies after 2 hrs at 39°C |            |                       |
|----------------------|-----------------------------|-----------------------------------------------------------------|-----------|-----------------------|-------------------------------------------------------------------|------------|-----------------------|
|                      |                             | Number                                                          | % (± SD*) | Total colonies tested | Number                                                            | % (± SD*)  | Total colonies tested |
| WT                   | 6                           | 5                                                               | 0.2 ± 0.1 | 3437                  | 10                                                                | 1.2 ± 1.0  | 4184                  |
| <i>ssb1/2Δ</i>       | 6                           | 119                                                             | 6.3 ± 1.5 | 11698                 | 676                                                               | 16.9 ± 1.5 | 3825                  |
| <i>ssb1/2Δ lsb2Δ</i> | 6                           | 7                                                               | 1.0 ± 0.5 | 1797                  | 14                                                                | 1.9 ± 0.9  | 1680                  |

Data for Fig. 4, A and B.

\*SD refers to standard deviation.

**Table S7.** Aggregation of Ste18 as detected by fluorescence microscopy.

| Strains        | Plasmid-based construct           | Time (h) | No extra CuSO <sub>4</sub> |     |      |        | 150 μM CuSO <sub>4</sub> |     |      |        |
|----------------|-----------------------------------|----------|----------------------------|-----|------|--------|--------------------------|-----|------|--------|
|                |                                   |          | Cells with aggregates      |     |      | Total* | Cells with aggregates    |     |      | Total* |
|                |                                   |          | #                          | %   | SE** |        | #                        | %   | SE** |        |
| WT             | <i>P<sub>CUP1</sub>-GFP</i>       | 0        | 0                          | 0   | 0.3  | 377    | 0                        | 0   | 0.3  | 377    |
|                |                                   | 6        | 0                          | 0   | 0.2  | 388    | 0                        | 0   | 0.3  | 371    |
|                |                                   | 24       | 0                          | 0   | 0.2  | 413    | 0                        | 0   | 0.2  | 471    |
|                | <i>P<sub>CUP1</sub>-GFP-STE18</i> | 0        | 0                          | 0   | 0.1  | 743    | 0                        | 0   | 0.1  | 743    |
|                |                                   | 6        | 0                          | 0   | 0.2  | 548    | 5                        | 2.3 | 2.7  | 486    |
|                |                                   | 24       | 0                          | 0   | 0.1  | 721    | 0                        | 0   | 0.1  | 748    |
| <i>ssb1/2Δ</i> | <i>P<sub>CUP1</sub>-GFP</i>       | 0        | 0                          | 0   | 0.2  | 557    | 0                        | 0   | 0.2  | 557    |
|                |                                   | 6        | 0                          | 0   | 0.2  | 417    | 0                        | 0   | 0.2  | 392    |
|                |                                   | 24       | 0                          | 0   | 0.2  | 511    | 0                        | 0   | 0.3  | 433    |
|                | <i>P<sub>CUP1</sub>-GFP-STE18</i> | 0        | 0                          | 0   | 0.2  | 617    | 0                        | 0   | 0.2  | 617    |
|                |                                   | 6        | 11                         | 2.8 | 1.6  | 489    | 46                       | 8.1 | 2.4  | 536    |
|                |                                   | 24       | 0                          | 0   | 0.1  | 762    | 2                        | 0.6 | 0.7  | 613    |

\*Cells with fluorescence.

\*\*SE refers to standard error.

Data for Fig. 5, C and D.

**Table S8.** Effect of *ssb1/2Δ* on the formation of [*STE*<sup>+</sup>].

| Strains        | Plasmid-based construct          | Number of cultures analyzed | Number of inducible colonies | Frequency of inducible colonies |     | Total colonies |
|----------------|----------------------------------|-----------------------------|------------------------------|---------------------------------|-----|----------------|
|                |                                  |                             |                              | %                               | SE* |                |
| WT             | <i>P<sub>CUP1</sub></i>          | 3                           | 0                            | 0                               | 0.1 | 1092           |
|                | <i>P<sub>CUP1</sub>-HA-STE18</i> | 4                           | 13                           | 0.9                             | 0.4 | 1421           |
| <i>ssb1/2Δ</i> | <i>P<sub>CUP1</sub></i>          | 3                           | 20                           | 1.9                             | 0.1 | 1073           |
|                | <i>P<sub>CUP1</sub>-HA-STE18</i> | 4                           | 84                           | 10.0                            | 0.3 | 842            |

Data for Fig. 6, B and C.

\*SE refers to standard error.

**Table S9.** Mitotic stability of [*STE*<sup>+</sup>].

| Origin                                          | Strain         | Mitotic stability* |               |             | Total |
|-------------------------------------------------|----------------|--------------------|---------------|-------------|-------|
|                                                 |                | High               | Intermediate  | Low         |       |
| Original isolates                               | WT             | 0                  | 0             | 2<br>(0-7%) | 2     |
|                                                 | <i>ssb1/2Δ</i> | 4<br>(33-58%)      | 4<br>(16-29%) | 1<br>(8.5%) | 9     |
| Isolates after storage at -80°C                 | <i>ssb1/2Δ</i> | 1<br>(75%)         | 2<br>(13-16%) | 6<br>(0-8%) | 9     |
| Isolates after the loss of <i>STE18</i> plasmid | <i>ssb1/2Δ</i> | 2<br>(36-45.5%)    | 4<br>(16-24%) | 4<br>(0%)   | 10    |

Examples are shown on Fig. 6A.

\*The observed ranges of prion retention for a given category are indicated in parentheses.

**Table S10.** Frequencies and rates of spontaneous [*URE3*] formation.

| Strains        | Number of cultures analyzed | Median frequency     |                            | Median rate           |                             |
|----------------|-----------------------------|----------------------|----------------------------|-----------------------|-----------------------------|
|                |                             | Ade <sup>+</sup>     | 95% confidence limits      | Ade <sup>+</sup>      | 95% confidence limits       |
| WT             | 30                          | 7.8x10 <sup>-6</sup> | (5.9-9.7)x10 <sup>-6</sup> | 1.8x10 <sup>-06</sup> | (1.4-2.2)x10 <sup>-6</sup>  |
| <i>ssb1/2Δ</i> | 30                          | 6.6x10 <sup>-6</sup> | (3.5-9.7)x10 <sup>-6</sup> | 1.4x10 <sup>-06</sup> | (0.8-2.1)x10 <sup>-6</sup>  |
| <i>zuo1Δ</i>   | 18                          | 4.9x10 <sup>-5</sup> | (3.8-6.0)x10 <sup>-5</sup> | 9.1x10 <sup>-6</sup>  | (7.2-11.0)x10 <sup>-6</sup> |

Data for Fig. 7, A and B.

**Table S11.** Mitotic stability of the [*URE3*] prion isolates.

| Strain         | Mitotic stability* |                        |                                 |                         |                          | % unstable | Total Ade <sup>+</sup> tested |
|----------------|--------------------|------------------------|---------------------------------|-------------------------|--------------------------|------------|-------------------------------|
|                | Unstable (0-10%)   | Low stability (11-30%) | Intermediate stability (31-79%) | High stability (80-99%) | Completely stable (100%) |            |                               |
| WT             | 20                 | 7                      | 11                              | 11                      | 15                       | 31.3       | 64                            |
| <i>ssb1/2Δ</i> | 0                  | 6                      | 16                              | 7                       | 34                       | 0.0        | 63                            |
| <i>zuo1Δ</i>   | 12                 | 4                      | 18                              | 28                      | 25                       | 13.8       | 87                            |

Data for Fig. 7, C and D.

\*The observed ranges of prion retention for a given category are indicated in parentheses.

**Table S12.** Curability of the [*URE3*] prion isolates by GuHCl.

| Strain         | Intermediate stability |           | High stability |           | Completely stable |           | % Curable | Total colonies tested |
|----------------|------------------------|-----------|----------------|-----------|-------------------|-----------|-----------|-----------------------|
|                | Curable                | Incurable | Curable        | Incurable | Curable           | Incurable |           |                       |
| WT             | 6                      | 2         | 10             | 0         | 12                | 7         | 75.7      | 37                    |
| <i>ssb1/2Δ</i> | 12                     | 5         | 11             | 0         | 4                 | 2         | 79.4      | 34                    |
| <i>zuo1Δ</i>   | 14                     | 10        | 10             | 4         | 5                 | 3         | 63.0      | 46                    |

Note: Highly unstable [*URE3*] prion isolates were excluded from curability assays.

**Table S13.** Effect of the Ssb reintroduction on [URE3] isolates obtained in the *ssb1/2Δ* background.

| Strain         | Colony | Prion manifestation after reintroduction Ssb |                            |                                             |                            | Prion mitotic stability after reintroduction of Ssb |                                             |
|----------------|--------|----------------------------------------------|----------------------------|---------------------------------------------|----------------------------|-----------------------------------------------------|---------------------------------------------|
|                |        | <i>SSB1</i><br>( $P_{GDP^-}$ <i>SSB1</i> )   |                            | <i>SSB2</i><br>( $P_{SSB2^-}$ <i>SSB2</i> ) |                            | <i>SSB1</i><br>( $P_{GDP^-}$ <i>SSB1</i> )          | <i>SSB2</i><br>( $P_{SSB2^-}$ <i>SSB2</i> ) |
|                |        | Retention*<br>of [URE3]                      | Sensitivity**<br>of [URE3] | Retention*<br>of [URE3]                     | Sensitivity**<br>of [URE3] | Stability of<br>[URE3]                              | Stability of<br>[URE3]                      |
| WT             | 1      | Yes                                          | I                          | Yes                                         | I                          | U                                                   | U                                           |
|                | 2      | Yes                                          | I                          | Yes                                         | I                          | U                                                   | U                                           |
|                | 3      | Yes                                          | I                          | Yes                                         | I                          | U                                                   | St                                          |
|                | 4      | Yes                                          | I                          | Yes                                         | I                          | U                                                   | U                                           |
|                | 5      | Yes                                          | I                          | Yes                                         | I                          | U                                                   | NT                                          |
|                | 6      | Yes                                          | I                          | Yes                                         | I                          | U                                                   | NT                                          |
| <i>ssb1/2Δ</i> | 1      | Yes                                          | PS                         | No                                          | S                          | D                                                   | D                                           |
|                | 2      | Yes                                          | PS                         | NT                                          | NT                         | D                                                   | NT                                          |
|                | 3      | Yes                                          | PS                         | Yes                                         | PS                         | D                                                   | D                                           |
|                | 4      | No                                           | S                          | NT                                          | NT                         | NA                                                  | NT                                          |
|                | 5      | Yes                                          | PS                         | Yes                                         | PS                         | D                                                   | D                                           |
|                | 6      | Yes                                          | PS                         | Yes                                         | I                          | D                                                   | U                                           |
|                | 7      | Yes                                          | PS                         | Yes                                         | PS                         | D                                                   | D                                           |
|                | 8      | Yes                                          | PS                         | No                                          | S                          | D                                                   | D                                           |
|                | 9      | No                                           | S                          | NT                                          | NT                         | NA                                                  | NT                                          |

\*As determined by a comparison between –Ade and –Ade-Leu medium.

\*\*As detected by growth on –Ade-Leu medium and color on complete medium.

#### Designations.

Prion manifestation: S – sensitive, PS - partially sensitive, I - insensitive.

Mitotic stability: D – destabilized, U - unchanged, St – stabilized.

NT - not tested, NA – not applicable.

Examples of plate images are shown on Fig. 7E.

**Table S14.** Effect of Zuo1 reintroduction on [URE3] isolates obtained in the *zuo1Δ* background.

| Strain       | Colony* | Growth after reintroduction<br>Zuo1<br>( <i>P<sub>TEF</sub>-ZUO1</i> ) |                          | Destabilization<br>after reintroduction<br>Zuo1 |
|--------------|---------|------------------------------------------------------------------------|--------------------------|-------------------------------------------------|
|              |         | Retention of<br>[URE3]                                                 | Sensitivity of<br>[URE3] | Stability of<br>[URE3]                          |
| WT           | 1       | Yes                                                                    | I                        | U                                               |
|              | 2       | Yes                                                                    | I                        | U                                               |
|              | 3       | Yes                                                                    | I                        | U                                               |
|              | 4       | Yes                                                                    | I                        | U                                               |
|              | 5       | Yes                                                                    | I                        | St                                              |
|              | 6       | Yes                                                                    | I                        | U                                               |
| <i>zuo1Δ</i> | 1       | No                                                                     | S                        | NA                                              |
|              | 2       | No                                                                     | S                        | NA                                              |
|              | 3       | Yes                                                                    | I                        | U                                               |
|              | 4       | Yes                                                                    | I                        | U                                               |

\*Only [URE3] isolates curable by GuHCl were checked.

Designations are the same as for Table S13.

Plate images are shown on Fig. 7F.

**Table S15.** Yeast strains.

| Name   | Prion<br>background                        | Genotype or origin                                                                      |
|--------|--------------------------------------------|-----------------------------------------------------------------------------------------|
| GT409  | [ <i>psi<sup>-</sup> pin<sup>-</sup></i> ] | <i>MATa ade1-14 his3 leu2-3,112 lys2 trp1 ura3-52</i>                                   |
| GT197  | [ <i>psi<sup>-</sup> pin<sup>-</sup></i> ] | GT409 <i>MATa</i>                                                                       |
| GT1786 | [ <i>psi<sup>-</sup> pin<sup>-</sup></i> ] | GT409 <i>ssb1Δ::HIS3 ssb2Δ::URA3</i>                                                    |
| GT2340 | [ <i>psi<sup>-</sup> pin<sup>-</sup></i> ] | <i>MATa ade1-14 his3 leu2-3,112 lys2 trp1 ura3-52</i><br><i>ssb1Δ::HIS3 ssb2Δ::ura3</i> |
| GT2283 | [ <i>psi<sup>-</sup> pin<sup>-</sup></i> ] | GT1786 <i>lsb2Δ::kanMX4</i>                                                             |
| WTY664 | [ <i>psi<sup>-</sup> pin<sup>-</sup></i> ] | GT409 <i>lsb2Δ::kanMX4</i>                                                              |
| GT159  | [ <i>psi<sup>-</sup> PIN<sup>+</sup></i> ] | <i>MATa ade1-14 his3 leu2-3,112 lys2 trp1 ura3-52</i>                                   |
| GT157  | [ <i>psi<sup>-</sup> PIN<sup>+</sup></i> ] | GT159 <i>ssb1Δ::HIS3 ssb2Δ::URA3</i>                                                    |
| BY241  | [ <i>ure3-0</i> ]                          | <i>MATa leu2 trp1 ura3 P<sub>DAL5</sub>::ADE2 P<sub>DAL5</sub>::CAN1 kar1-1</i>         |
| GT2175 | [ <i>ure3-0</i> ]                          | BY241 <i>zuo1Δ::kanMX4</i>                                                              |
| GT2398 | [ <i>ure3-0</i> ]                          | BY241 <i>ssb1Δ::TRP1</i>                                                                |
| GT2438 | [ <i>ure3-0</i> ]                          | BY241 <i>ssb1Δ::TRP1 ssb2Δ::URA3</i>                                                    |
